## **Causal Evidence for the Dependence of the Magnitude Effect on Dorsolateral Prefrontal Cortex**

**Ian C. Ballard<sup>1,2</sup>, Gökhan Aydogan<sup>3</sup>, Bokyung Kim<sup>2</sup>, Samuel M. McClure<sup>3</sup>**

1. Stanford Neurosciences Graduate Training Program, Stanford University. Stanford, CA 94305, USA
2. Department of Psychology, Stanford University, Stanford, CA 94305, USA.
3. Department of Psychology, Arizona State University, Tempe, AZ 85287, USA.

**Corresponding Author:** Ian Ballard, [iancballard@gmail.com](mailto:iancballard@gmail.com)

**Conflict of Interest:** The authors declare no competing financial interests.

**Acknowledgements:** This work was supported by NSF grant 1358507 (SMM).

**Keywords:** self-control, decision-making, delay of gratification, framing, TMS

## rTMS effects on decision framing

### Abstract

Impulsivity refers to the tendency to insufficiently consider alternatives or to overvalue rewards that are available sooner. The latter form of impulsivity – present bias – is a hallmark of human decision making with well documented health and financial ramifications. Numerous contextual changes and framing manipulations can powerfully influence present bias. One of the most robust such phenomenon is the finding that people are more patient as the values of choice options are increased. This magnitude effect has been related to cognitive control mechanisms in the dorsal lateral prefrontal cortex (dlPFC). We used repetitive transcranial magnetic stimulation (rTMS) to transiently disrupt neural activity in dlPFC. This manipulation dramatically reduced the magnitude effect, establishing causal evidence that the magnitude effect depends on dlPFC.

## rTMS effects on decision framing

# 1 Introduction

Humans are often short-sighted in their decision-making and choose immediate gratification at the expense of great longer-term benefits. This behavior is pervasive and contributes to large scale societal problems such as obesity (Wertenbroch, 1998), drug addiction (McClure & Bickel, 2014), and retirement (Ashraf, Karlan, & Yin, 2006) and health savings shortfalls (Eliasz & Spiegler, 2006). The most prevalent laboratory measure of impulsivity is the discount rate estimated from intertemporal choice tasks. Individual discount rates are stable across time (Kirby, 2009), but vary substantially based on choice context and framing (Loewenstein & Prelec, 1992). One of the largest contextual effects known to reduce impulsivity is the *magnitude effect*, which refers to the phenomenon that people show less present bias when choosing between high magnitude options (Thaler, 1981). Recent behavioral studies support the idea that large magnitudes trigger increased self-control, which in turn reduces present bias (Ballard et al., 2017). Further, correlational fMRI investigations have associated high magnitude decision-making with activation of the dorsolateral prefrontal cortex (dlPFC) (Ballard et al., 2017). We tested whether we could find causal evidence that dlPFC-mediated control underlies the reduced impulsivity observed in the magnitude effect. To do so, we used repetitive transcranial magnetic stimulation (rTMS) to temporarily disrupt dlPFC activity and test for effects on the size of the magnitude effect.

The dlPFC is activated when self-control is exerted (Crockett et al., 2013) and is necessary for the deployment of self-control (Figner et al., 2010). The dlPFC likely influences control of decision making via multiple mechanisms: the dlPFC supports the maintenance of goals and task information (Curtis & D'Esposito, 2003; Jimura, Chushak, Westbrook, & Braver,

## rTMS effects on decision framing

2017; Miller & Cohen, 2001), increases the fidelity of internal representations of task variables (Waskom, Frank, & Wagner, 2017), and exerts top-down control over affective systems (Ochsner, Silvers, & Buhle, 2012). In contrast, neurons in the ventral striatum encode the learned values of different choice attributes (Roesch, Singh, Brown, Mullins, & Schoenbaum, 2009), and in human neuroimaging experiments, ventral striatum activation tracks the subjective value of rewards (Bartra, McGuire, & Kable, 2013; Knutson, Adams, Fong, & Hommer, 2001). Information from these and other circuits is integrated in the ventromedial prefrontal cortex vmPFC (Hare, Camerer, & Rangel, 2009), where different options are compared sequentially (Rich & Wallis, 2016). Manipulations that alter decision making can act at different points in this decision-making process. We have proposed that large reward magnitudes trigger engagement of control processes in the dlPFC (Ballard et al., 2017), which results in more patient decision-making, whereas manipulations that affect the perceptual fluency of rewards primarily impact valuation in the striatum (Magen, Kim, Dweck, Gross, & McClure, 2014).

We tested whether we could detect causal support for this model using rTMS, which transiently disrupts neural activity (Robertson, Théoret, & Pascual-Leone, 2003), over the dlPFC. Beyond establishing causal evidence in support of fMRI results, this finding would also help adjudicate between alternative psychological and economic models of the magnitude effect. In particular, prior behavioral experiments that have attempted to rule out alternate models of the magnitude effect have been unable to exclude the *utility account* (Ballard et al., 2017; Loewenstein & Prelec, 1992). According to this account, subjective valuation itself is sensitive to magnitudes, such that the ratio between the utilities of \$20 and \$10 is perceived to be smaller than the ratio between the utilities of \$2,000 and \$1,000 (i.e. increasing elasticity with magnitude). Because of this, the larger reward in the high-magnitude condition is perceived as

## rTMS effects on decision framing

proportionately more valuable than the larger reward in the low-magnitude condition. rTMS over dlPFC has been shown to increase impulsive choice without impairing subjective valuation of rewards, consistent with a role for the dlPFC in self-control (Figner et al., 2010). This finding is also consistent with substantial evidence that the medial wall of the prefrontal cortex is associated with valuation (Bartra et al., 2013; Wallis, 2007), and this area should not be directly affected by rTMS over dlPFC. Because rTMS over dlPFC should not directly affect brain circuits involved in valuation, the utility account predicts that rTMS should have a similar effect in high-versus-low magnitude conditions. In contrast, the self-control model of the magnitude effect predicts that rTMS should have a larger effect in the high-magnitude than the low magnitude condition.

## 2 Method

*2.1 Participants.* Twenty-seven right-handed participants completed this study (11 females; mean age =  $26.4 \pm 3.8$ ). All participants reported having no history of neurological or psychiatric problems and no females were currently pregnant. All participants gave written informed consent to participate in the study that was approved by the Stanford University Institutional Review Board. Three additional participants had consented. One of them was excluded from further study by the investigator due to excessive head movement during rTMS, and two of them chose to withdraw during the task. No participant experienced adverse effects or reported any scalp pain, neck pain, or headaches after the experiment. We randomly assigned participants to receive a train of rTMS to either the left dorsal lateral prefrontal cortex (dlPFC) (left rTMS group;  $n = 15$ ), or the right dlPFC (right rTMS group;  $n = 12$ ).

## rTMS effects on decision framing

*2.2 Repetitive Transcranial Magnetic Stimulation (rTMS).* rTMS was administered to the dlPFC for 15 minutes before participants conducted the main task. Low-frequency (1 Hz) rTMS was delivered with a commercially-available figure-eight coil (70-mm diameter double-circle (Magstim, Winchester MA). The coil was held tangential to the participant's head, with the handle pointing rostrally. Participants received a single, 15-min, 1-Hz rTMS train (900 pulses) over either the left dlPFC or right dlPFC. We tailored the stimulation strength by stimulating the motor cortex. Once we found the smallest amount of stimulation to make a finger consistently twitch, we set the power to 120% of this motor threshold and gave participants a test stimulation of 1Hz for 30 seconds and asked them if they could tolerate the stimulation. If the participant had a threshold over 83% of maximal TMS power, we ran at 100% power. Sham stimulation was delivered through by flipping the coil to stimulate away from the head. This produces the same clicking sound as produced by the real stimulation and significantly lowers the stimulation level. Flipping the coil has commonly been used to redirect the TMS field as a control condition (Hoeft, Wu, Hernandez, Glover, & Shimojo, 2008).

For stimulation of the left and right dlPFC, the TMS coil was placed over F4 and F3 using the electroencephalogram 10-20 coordination system, as in previous studies (Figner et al., 2010). The rTMS parameters were well within currently recommended guidelines, and stimulation using these parameters results in a suppression of excitability of the targeted cortical region (Robertson et al., 2003). There is considerable uncertainty about the duration of the rTMS effects. However, effects appear to last for at least as long as half the duration of the stimulation (Mottaghy, Gangitano, Sparing, Krause, & Pascual-Leone, 2002). Therefore, participants were asked to conduct the main tasks immediately after the stimulation in the same laboratory room. Task instruction and practice trials were given before the stimulation. All three conditions took

## rTMS effects on decision framing

on average less than 8 minutes in pre-test session, and less than 6.5 minutes in session 1 and 2.

There was a 20-minute long break between sessions, and all participants received real or sham rTMS to the dlPFC in session 1 and the other type of stimulation to the dlPFC in session 2.

Subjects were blind to the type of stimulation they received.

*2.3 Choice Tasks and Procedures.* The original purpose of the study was to compare the effect of rTMS on two different framing effects. The first, the magnitude effect, is the phenomenon that people become more patient as the magnitude of all options increase. The second, the hidden zero effect, is the finding that people are more patient when zero valued options are stated among immediate and delayed rewards, e.g. \$20 now and \$0 in two weeks. Based on previous neuroimaging work, we hypothesized the magnitude effect should be more strongly affected by rTMS over dlPFC than the hidden zero effect (Ballard et al., 2017; Magen, Dweck, & Gross, 2008). We explain in the Results why differences between the framing conditions make comparisons difficult to interpret, and we report the results of all experimental conditions.

Three conditions (control, high magnitude, and explicit zero condition) consisted of 20 choices each. All three conditions were scheduled as within-subject design, and the order of conditions was randomized. Subjects made a series of binary intertemporal choices between smaller rewards,  $r_1$ , available immediately, and larger rewards,  $r_2$ , available after delay  $t$  (2 weeks or 1 month). In the control and high magnitude condition, the options were simply presented as a form of ‘\$ $r_1$  today’ for the sooner option, and ‘\$ $r_2$  in  $t$ ’ for the later option. In the explicit-zero condition, the options had “explicit-zero” framing, so the sooner option is expressed as ‘\$ $r_1$  today and \$0 in  $t$ ’ and the later option is expressed as ‘\$0 today and \$ $r_2$  in  $t$ .’

## rTMS effects on decision framing

We varied  $r_2/r_1$  to span a difference from 1% to 50% in reward values for the control and zero condition, and from 0.1% to 5% for the high magnitude condition (Ballard et al., 2017).

This design is essential because the magnitude effect is so pronounced that fixing proportional differences creates large subjective value differences between conditions (e.g., our average subject is roughly ambivalent between \$20 now and \$24 in 2 weeks, but overwhelmingly prefers \$2,400 in 2 weeks to \$2000 now). Our design makes it possible to estimate discount rates for both high and low magnitude conditions and attempts to match the difficulty of the choice set between conditions (cf. Ballard et al., 2017). The magnitude of  $r_1$  was varied so that it had a mean of either \$20 (control and zero condition) or \$2,000 (high magnitude). Because discount rates for hypothetical rewards are a close proxy to those of real rewards (M. W. Johnson & Bickel, 2002), and because framing effects are also observed with hypothetical rewards (M. W. Johnson & Bickel, 2002), we used hypothetical decisions. Earlier options were always presented on the left side of the display and preferences were indicated by button press. Choice trials were self-paced with a maximum response time of 15s. After making a selection, subjects viewed a 2s feedback screen indicating that the response was recorded.

Two days before the laboratory experiment, participants completed online choice tasks. This pretest used the same format as the main task, except that there was no time limit. On the date of the in-lab experiment, participants gave written consent for the rTMS treatment, and were instructed about the rTMS procedures.

*2.4 Analysis.* Discount rates,  $k$ , were estimated for each condition assuming a hyperbolic discount function of the form:

$$V = \frac{r}{1 + kt}$$



## rTMS effects on decision framing

where  $V$  is the subjective value,  $r$  is the reward in dollars, and  $t$  is the time to reward delivery.

We estimated a discount rate for each subject individually by assuming a softmax decision function and maximizing the log-likelihood of the observed choices as a function of  $k$  and the softmax noise parameter  $\alpha$ . This approach utilizes the known shape of discount functions in order to disentangle the effects of choice noise from present bias on choice. As such, discount rate is a sensitive and specific dependent variable that captures present bias. However, we also conducted a similar analysis on the probability of shorter-sooner choice. This approach conflates present bias and choice noise, but it is more transparently related to the raw data. The results of this analysis are qualitatively the same as with discount rates and are described in the Supplemental Information. We fit the models using the conjugate gradient algorithm implemented in Scipy within the Python programming language. In addition, we used Scipy's basinhopping wrapper with 50 initializations in an attempt to avoid local minima. Discount rates were log-transformed. All tests used type III mixed ANOVAs with Greenhouse-Geisser sphericity correction implemented in R.

*2.5 Open Practices.* All data and analysis code can be accessed at [https://github.com/iancballard/tms\\_discounting](https://github.com/iancballard/tms_discounting)

## 3 Results

## rTMS effects on decision framing

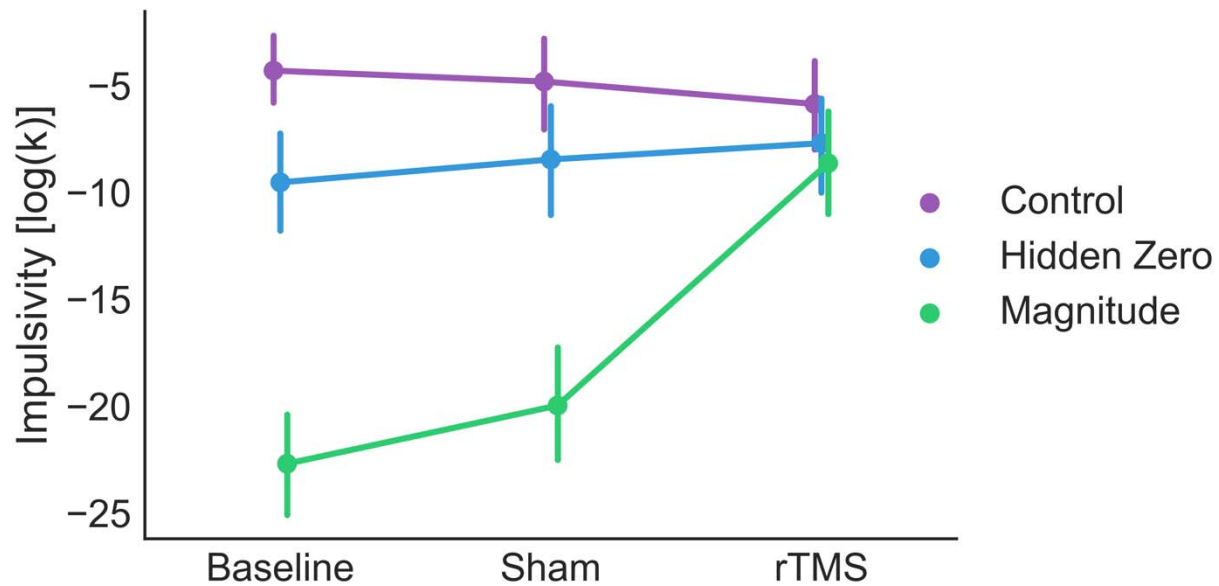

**Figure 1.** Impulsivity plotted as a function of rTMS condition and context/framing effect. Both the large magnitudes and explicit zero manipulations reduced impulsivity relative to control. rTMS reduced the magnitude effect relative to both baseline and sham. rTMS reduced the hidden zero effect relative to baseline but not to sham. Error bars reflect between-subjects standard errors of the mean.

*3.1 Magnitude Effect.* We hypothesized that rTMS over DIPFC would disrupt the magnitude effect. Because we had both a pre-experiment control session and a sham TMS control session, we examined the effect of rTMS against both controls. This approach provides a stronger test of our manipulation because it confirms that the effect of rTMS is robust to day-to-day fluctuations in impulsivity. We constructed a separate mixed-effects ANOVA for each measure of baseline. Both models had hemisphere as a between-subject effect and rTMS level and framing condition as within-subject effects. We first tested whether we reproduced the magnitude effect and found a robust effect of reward magnitude on discount rate with respect to both pre-experiment baseline,  $F(1,25) = 172, p < .001, \eta_g^2 = 0.39$  and sham rTMS,  $F(1,25) = 43.8, p < .001, \eta_g^2 = 0.27$ , Figure 1. This effect is similar in size to that observed in previous studies (Ballard et al., 2017).

## rTMS effects on decision framing

Our central hypothesis was that rTMS over dlPFC should reduce the magnitude effect. We observed an interaction in which rTMS reduced the size of the magnitude effect with respect to both pre-experiment baseline,  $F(1,25) = 90.4, p < .001, \eta^2_g = 0.27$ , and sham rTMS,  $F(1,25) = 49.3, p < .001, \eta^2_g = 0.15$ , Figure 1. Therefore, rTMS over dlPFC dramatically reduces the magnitude effect. Because significant interactions can complicate interpretation of main effects, we conducted several post-hoc *t*-tests to better understand these results. First, we tested whether we observed a significant magnitude effect in the absence of rTMS. Large magnitudes reduced impulsivity relative to both baseline,  $t(24) = 15.6, p < .001$ , and sham,  $t(24) = 7.9, p < .001$ , replicating the magnitude effect. We predicted that rTMS should have a larger impact on high magnitude choices. We examined whether rTMS increased impulsivity for the low magnitude choices and found no effect relative to either baseline in either hemisphere or for both hemispheres pooled together (all  $p > .15$ ). Although this finding fails to replicate the finding that rTMS over dlPFC increases impulsivity (Figner et al., 2010), an analysis using comparable statistical methods to previous work revealed a small effect of rTMS on low magnitude discount rates<sup>1</sup>. In light of these results, we conclude that our overall effects are best interpreted rTMS having a large effect on choices selectively in large magnitude decisions.

Finally, because previous reports have found an effect of hemisphere of rTMS on discounting (Figner et al., 2010), we also examined whether hemisphere interacted with any of

---

<sup>1</sup> It is important to note that Figner et al., (2010) used a model-free analysis of the percent of shorter-sooner choices, whereas we used a discounting model-based analysis. Our approach disentangles impulsivity from choice stochasticity. However, to make our results comparable, we additionally implemented a model-free analysis that followed Figner et al. (2010). We logit transformed the probability of shorter-sooner choice for each condition and each subject. A mixed-effects ANOVA with hemisphere as a between-subject effect and stimulation as a within-subject effect revealed a marginal effect of stimulation on discounting with respect to baseline  $F(1,25) = 4.3, p = .05, \eta^2_g = 0.07$ , and a significant effect with respect to sham rTMS,  $F(1,25) = 5.93, p = .02, \eta^2_g = 0.03$ . We did not observe any effects of hemisphere or interactions between hemisphere and stimulation (all  $p > .2$ ). Therefore, by analyzing the data in a model-free manner, we are able to partially confirm findings of Figner et al., (2010) that rTMS over IPFC increases present bias. This analysis approach produces the same qualitative pattern of results for all other analyses reported herein.

## rTMS effects on decision framing

these effects. We found that hemisphere of stimulation had no effect on discounting, no effect on the magnitude effect, no effect on the influence of rTMS on discounting, and no effect on the interaction between rTMS and framing, with respect to either control condition (all  $p > .1$ ), Table 1.

| Sham           | Factor          | $df$  | $F$  | $\eta$ | $p$   |
|----------------|-----------------|-------|------|--------|-------|
|                | hemisphere      | 1, 25 | 0.35 | .005   | .56   |
|                | magnitude (mag) | 1, 25 | 43.8 | .27    | <.001 |
|                | hemi:mag        | 1, 25 | 0.09 | <.001  | .77   |
|                | TMS             | 1, 25 | 9.57 | .11    | .005  |
|                | hemi:TMS        | 1, 25 | 0.04 | <.001  | .85   |
|                | mag:TMS         | 1, 25 | 49.3 | .15    | <.001 |
|                | hemi:mag:TMS    | 1, 25 | 0.71 | .003   | .41   |
| Pre-Experiment |                 |       |      |        |       |
|                | hemisphere      | 1, 25 | 0.02 | <.001  | .89   |
|                | magnitude (mag) | 1, 25 | 172  | .39    | <.001 |
|                | hemi:mag        | 1, 25 | 0.08 | <.001  | .78   |
|                | TMS             | 1, 25 | 15.5 | .19    | <.001 |
|                | hemi:TMS        | 1, 25 | 0.98 | .01    | .33   |
|                | mag:TMS         | 1, 25 | 90.4 | .27    | <.001 |
|                | hemi:mag:TMS    | 1, 25 | 2.71 | .01    | .11   |

**Table 1.** Results of ANOVAs assessing the magnitude effect relative to two different control conditions (Sham and Pre-Experiment). Both ANOVAs show significant effects of magnitude, a significant effect of TMS, and a significant interaction between the magnitude effect and TMS.  $\eta$  refers to generalized eta squared.

*3.2 Hidden Zero Effect.* We next turned to the effect of rTMS on the hidden zero effect, which refers to the finding that people are more patient when zero-value rewards are stated explicitly, e.g. \$20 now and \$0 in two weeks. Previous work has suggested that the hidden zero effect arises due to a difference in reward processing in the striatum between framing conditions (Magen et al., 2014). Additionally, this study found no difference in dlPFC activation between hidden and

## rTMS effects on decision framing

explicit zero framing. We therefore predicted that rTMS would have no impact on the hidden zero effect.

We analyzed data in the same manner as for the magnitude effect. We first tested for the presence of a hidden-zero effect and observed an effect of explicit zero framing on discounting with respect to both pre-experiment baseline,  $F(1,25) = 18.8, p < .001, \eta_g^2 = 0.06$ , and sham TMS,  $F(1,25) = 7.0, p = .01, \eta_g^2 = 0.03$ . Therefore, we replicated the hidden zero effect.

With respect to sham TMS, we found no interaction between TMS and the framing manipulation ( $p > .2$ ), consistent with our hypothesis. Contrary to our hypothesis, we did observe an interaction between TMS and the hidden zero effect with respect to pre-experimental baseline, TMS,  $F(1,25) = 5.1, p = .03, \eta_g^2 = 0.02$ , but not in sham,  $p > .2$ , Figure 1. It is possible that this difference between controls was due to the difference in the baseline size of the hidden zero effect. We conducted post-hoc tests of the hidden-zero effect in our control conditions and found that it was significant in the pre-experiment baseline,  $t(24) = 3.49, p < .002$ , but only marginal in sham TMS,  $t(24) = 1.93, p = .064$ . Therefore, the lack of a significant effect of rTMS on the hidden zero effect with respect to sham TMS could be driven by the fact that the hidden zero effect was weak in sham TMS. Like the magnitude effect, we found no effects of rTMS on discount rates by hemisphere (Table 2). Overall, our results are inconclusive but suggestive of an unanticipated effect of dlPFC-rTMS on the hidden-zero effect.

## rTMS effects on decision framing

| Sham           | Factor           | <i>df</i> | <i>F</i> | $\eta$ | <i>p</i> |  |
|----------------|------------------|-----------|----------|--------|----------|--|
|                | hemisphere       | 1, 25     | 0.12     | .003   | .73      |  |
|                | hidden zero (hz) | 1, 25     | 7.0      | .03    | .01      |  |
|                | hemi:hz          | 1, 25     | 0.02     | <.001  | .90      |  |
|                | TMS              | 1, 25     | 0.02     | <.001  | .90      |  |
|                | hemi:TMS         | 1, 25     | 0.07     | <.001  | .79      |  |
|                | hz:TMS           | 1, 25     | 0.77     | .003   | .39      |  |
|                | hemi:hz:TMS      | 1, 25     | <.001    | <.001  | .98      |  |
| Pre-Experiment |                  |           |          |        |          |  |
|                | hemisphere       | 1, 25     | 0.22     | .005   | .64      |  |
|                | hidden zero (hz) | 1, 25     | 18.8     | .06    | <.001    |  |
|                | hemi:hz          | 1, 25     | 1.46     | .005   | .24      |  |
|                | TMS              | 1, 25     | 0.04     | <.001  | .84      |  |
|                | hemi:TMS         | 1, 25     | 0.97     | .01    | .33      |  |
|                | hz:TMS           | 1, 25     | 5.13     | .02    | .03      |  |
|                | hemi:hz:TMS      | 1, 25     | 2.13     | .007   | .16      |  |

**Table 2.** Results of ANOVAs assessing the hidden zero effect relative to two different control conditions (Sham and Pre-Experiment). Both ANOVAs show significant effects of hidden zero framing. However, only the pre-experiment assessment of baseline showed a significant effect of TMS on the hidden zero effect. H refers to generalized eta squared.

*3.3 Direct comparison of framing effects.* Our original hypothesis was that the rTMS would disrupt the magnitude effect but not the hidden zero effect. We found evidence that rTMS disrupted both effects. We next considered whether rTMS had a *larger* effect on the magnitude effect than on the hidden zero effect. However, this hypothesis is difficult to assess in an unbiased manner because the magnitude effect is so much larger than the hidden zero effect in the absence of rTMS: Given the baseline size of the two effects, it is mathematically impossible for rTMS to exert a larger influence on the hidden-zero effect (unless TMS caused the hidden effect to reverse). Note that this bias also effects standard nonparametric tests such as signed ranks. To avoid this, we counted the number of subjects for whom TMS reduced the magnitude

## rTMS effects on decision framing

effect (26 out of 27) and the number for whom TMS reduced the Hidden Zero effect (18 out of 27) and compared these proportions using a two-sided Fisher's exact test. We found that the proportions differed, odds ratio = 13.0,  $p = .011$ , indicating that rTMS reduced the magnitude effect more frequently than it reduced the hidden zero effect. However, the relative weakness of the baseline hidden zero effect makes it difficult to draw strong conclusions from this result.

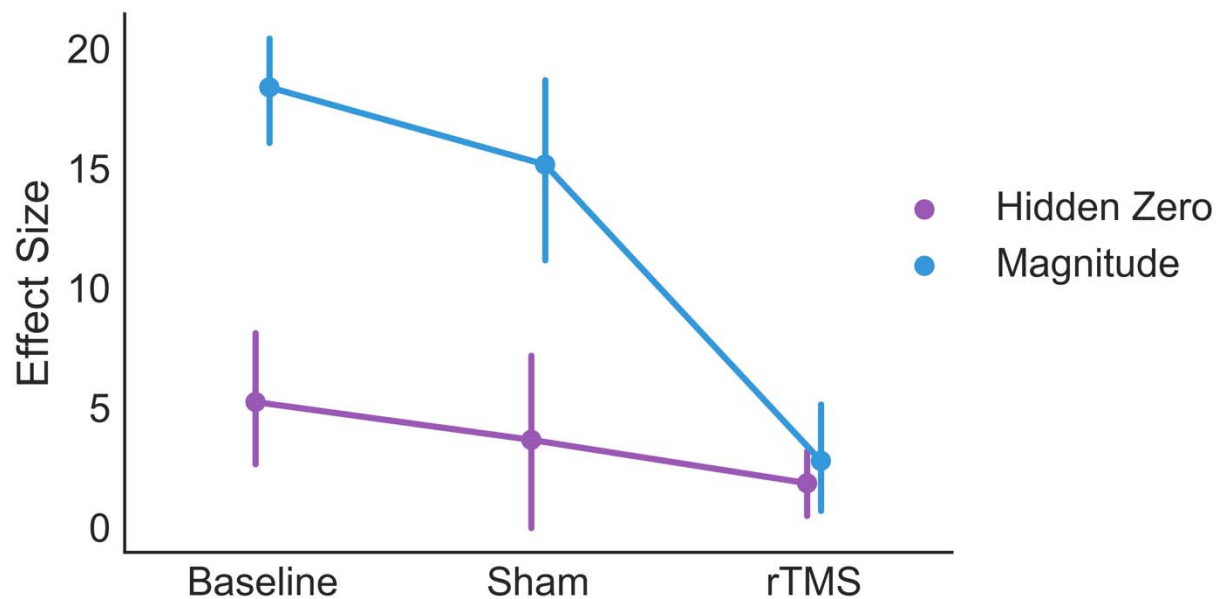

**Figure 2.** Comparison of the effect of TMS on the magnitude and hidden zero effects. “Effect size” refers to the difference in  $\log(k)$  between the contextual/framing conditions and the control condition. The difference in impulsivity between conditions is plotted for each manipulation. Above zero effect size indicates an effect of choice framing or context. The change in effect size caused by TMS is larger for the magnitude effect than the hidden zero effect. Error bars reflect between-subjects standard errors of the mean.

## 4 Discussion

Cognitive control refers to a set of processes support goal directed behavior. Control mechanisms likely influence intertemporal choices by maintaining a representation of specific goals that bear on the decision (e.g., I am going on vacation this summer and need to save),

## rTMS effects on decision framing

building a mental simulation of the hedonic experience of receiving a reward in the future, and guiding attention to the relevant dimensions of the choice (Jimura et al., 2017). Cognitive control therefore acts as countervailing force against impulsive choice by encouraging a balanced assessment of one's true preference. However, cognitive control is costly to exert and is adaptively deployed in more important or more difficult decisions (Payne, Bettman, & Johnson, 1993; Shenhav, Botvinick, & Cohen, 2013). In the magnitude effect, large valued choices may signal a more important decision and trigger the increased engagement of control processes (Ballard et al., 2017). We demonstrated that disruption of dlPFC activity, which has been robustly associated with cognitive control (Yeo et al., 2015), dramatically reduces the magnitude effect. This result establishes a causal role for the dlPFC in the magnitude effect.

In addition, this result is inconsistent with the predictions of the utility model of the magnitude effect. Because rTMS over dlPFC should influence control processes without directly affect valuation of rewards (Figner et al., 2010), the utility model incorrectly predicts that rTMS should have a similar effect in both high and low magnitude contexts. Our previous work showed that hunger, which is associated with reduced self-control, reduces the magnitude effect by increasing impulsivity for large magnitude choices. In addition, we showed that asking subjects to justify their decisions, which enforces the exertion of self-control, eliminates the magnitude effect by decreasing impulsivity for small magnitude choices (Ballard et al., 2017). It was possible that these behavioral manipulations effected subjective valuation, and therefore the present rTMS finding provides an important piece of evidence against the utility model. Further evidence against the utility model comes from behavioral assessment of utilities, which have failed to support the utility model's central tenant that subjects show increasing sensitivity to proportional differences with large magnitudes (Chapman, 1996). Of the other models of the



## rTMS effects on decision framing

magnitude effect the authors are aware of, only the *memory sampling* model can account for previous behavioral findings as well as the present rTMS result. According to this model, decisions are made by sampling experiences from memory that are similar to the available options and comparing the affective value of those experiences (Bornstein & Norman, 2017; Bornstein, Khaw, Shohamy, & Daw, 2017; Stewart, Chater, & Brown, 2006). Because larger rewards are generally associated with longer delays (e.g., monthly paychecks), the same time delay will seem comparatively shorter when considered in the context of a large reward and have less of an impact on choice. It is possible that disruption of the dlPFC impairs the ability to search memory for experiences with large, delayed rewards, which are less common than experiences with small rewards. Future work is needed to test the self-control model against the sampling model in a paradigm where they make opposing predictions.

In addition to the effect of rTMS on the magnitude effect, we find mixed evidence that rTMS reduces hidden zero effect. Specifically, we found a significant difference of rTMS compared to pre-experimental baseline but not to sham rTMS. However, the hidden-zero effect was weak in the sham condition. There are several possible explanations for this result. First, the hidden zero effect may be sensitive to pre-exposure to the task and therefore may diminish over time. Second, there might be a stronger dependence of the hidden zero effect on prefrontal cortex than previously anticipated. Third, the integration of the additional information (i.e. the explicit zero) may partially depend on functions supported by the dlPFC. Thus, even though the information is explicit, it may be more difficult to attend to and incorporate this information under rTMS. Future work should systematically examine these possibilities.

We did not observe any effects of hemisphere in any of our comparisons. This result contrasts with the finding that rTMS (Figner et al., 2010) and current stimulation (Hecht, Walsh,

## rTMS effects on decision framing

& Lavidor, 2011; Shen et al., 2016) of left, but not right, prefrontal cortex biases decision-making. In spite of these findings, a large literature has established that cognitive control functions are associated with a bilateral fronto-parietal network (Niendam et al., 2012; Yeo et al., 2011). With the exception of response inhibition, which is more strongly associated with right ventrolateral prefrontal cortex (Aron, Robbins, & Poldrack, 2004), there is little empirical evidence that control mechanisms are lateralized. Our results, although divergent from previous brain stimulation studies of intertemporal choice, are therefore consistent with a broad literature showing bilateral prefrontal involvement in self-control.

A major goal of decision neuroscience is to understand the psychological dimensions and neural processes that underlie decisions between delayed rewards. This in turn could lead to novel strategies for combatting maladaptive decision making. Our finding that the dlPFC is causally involved in the magnitude effect suggests that interventions that increase the function of this region and its associated brain networks could improve economic decision making.

## rTMS effects on decision framing

## References

- Aron, A. R., Robbins, T. W., & Poldrack, R. A. (2004). Inhibition and the right inferior frontal cortex. *Trends in Cognitive Sciences*.
- Ashraf, N., Karlan, D., & Yin, W. (2006). Tying Odysseus to the Mast: Evidence From a Commitment Savings Product in the Philippines. *The Quarterly Journal of Economics*, *121*(2), 635–672. <http://doi.org/10.1162/qjec.2006.121.2.635>
- Ballard, I. C., Kim, B., Liatsis, A., Aydogan, G., Cohen, J. D., & McClure, S. M. (2017). More Is Meaningful: The Magnitude Effect in Intertemporal Choice Depends on Self-Control. *Psychological Science*, *27*(10), 956797617711455–1454. <http://doi.org/10.1177/0956797617711455>
- Bartra, O., McGuire, J. T., & Kable, J. W. (2013). The valuation system: A coordinate-based meta-analysis of BOLD fMRI experiments examining neural correlates of subjective value. *NeuroImage*, *76*, 412–427. <http://doi.org/10.1016/j.neuroimage.2013.02.063>
- Bornstein, A. M., & Norman, K. A. (2017). Reinstated episodic context guides sampling-based decisions for reward. *Nature Publishing Group*, *20*(7), 997. <http://doi.org/10.1038/nn.4573>
- Bornstein, A. M., Khaw, M. W., Shohamy, D., & Daw, N. D. (2017). Reminders of past choices bias decisions for reward in humans. *Nature Communications*, *8*, 15958. <http://doi.org/10.1038/ncomms15958>
- Chapman, G. B. (1996). Temporal discounting and utility for health and money. *Journal of Experimental Psychology. Learning, Memory, and Cognition*, *22*(3), 1–21. <http://doi.org/10.1037/0278-7393.22.3.771>
- Crockett, M. J., Braams, B. R., Clark, L., Tobler, P. N., Robbins, T. W., & Kalenscher, T. (2013). Restricting Temptations: Neural Mechanisms of Precommitment. *Neuron*, *79*(2), 391–401. <http://doi.org/10.1016/j.neuron.2013.05.028>
- Curtis, C. E., & D'Esposito, M. (2003). Persistent activity in the prefrontal cortex during working memory. *Trends in Cognitive Sciences*, *7*(9), 415–423. [http://doi.org/10.1016/S1364-6613\(03\)00197-9](http://doi.org/10.1016/S1364-6613(03)00197-9)
- Eliasz, K., & Spiegler, R. (2006). Contracting with Diversely Naive Agents. *The Review of Economic Studies*, *73*(3), 689–714. <http://doi.org/10.1111/j.1467-937X.2006.00392.x>
- Figner, B., Knoch, D., Johnson, E. J., Krosch, A. R., Lisanby, S. H., Fehr, E., & Weber, E. U. (2010). Lateral prefrontal cortex and self-control in intertemporal choice. *Nature Publishing Group*, *13*(5), 538–539. <http://doi.org/10.1038/nn.2516>
- Hare, T. A., Camerer, C. F., & Rangel, A. (2009). Self-Control in Decision-Making Involves Modulation of the vmPFC Valuation System. *Science*, *324*(5927), 646–648. <http://doi.org/10.1126/science.1168450>
- Hecht, D., Walsh, V., & Lavidor, M. (2011). Bi-frontal direct current stimulation affects delay discounting choices. *Cognitive Neuroscience*, *4*(1), 7–11. <http://doi.org/10.1080/17588928.2011.638139>
- Hoehn, F., Wu, D.-A., Hernandez, A., Glover, G. H., & Shimojo, S. (2008). Electronically Switchable Sham Transcranial Magnetic Stimulation (TMS) System. *PLoS One*, *3*(4), e1923. <http://doi.org/10.1371/journal.pone.0001923>
- Jimura, K., Chushak, M. S., Westbrook, A., & Braver, T. S. (2017). Intertemporal Decision-Making Involves Prefrontal Control Mechanisms Associated with Working Memory. *Cerebral Cortex*, *28*(4), 1–12. <http://doi.org/10.1093/cercor/bhx015>

## rTMS effects on decision framing

- Johnson, M. W., & Bickel, W. K. (2002). Within-subject comparison of real and hypothetical money rewards in delay discounting. *Journal of the Experimental Analysis of Behavior*, 77(2), 129–146. <http://doi.org/10.1901/jeab.2002.77-129>
- Knutson, B., Adams, C. M., Fong, G. W., & Hommer, D. (2001). Anticipation of increasing monetary reward selectively recruits nucleus accumbens. *The Journal of Neuroscience : the Official Journal of the Society for Neuroscience*.
- Loewenstein, G., & Prelec, D. (1992). Anomalies in Intertemporal Choice: Evidence and an Interpretation. *The Quarterly Journal of Economics*, 107(2), 573–597. <http://doi.org/10.2307/2118482>
- Magen, E., Dweck, C. S., & Gross, J. J. (2008). The hidden-zero effect: representing a single choice as an extended sequence reduces impulsive choice. *Psychological Science*, 19(7), 648–649. <http://doi.org/10.1111/j.1467-9280.2008.02137.x>
- Magen, E., Kim, B., Dweck, C. S., Gross, J. J., & McClure, S. M. (2014). Behavioral and neural correlates of increased self-control in the absence of increased willpower. *Proceedings of the National Academy of Sciences of the United States of America*, 111(27), 9786–9791. <http://doi.org/10.1073/pnas.1408991111>
- Miller, E. K., & Cohen, J. D. (2001). An Integrative Theory of Prefrontal Cortex Function. *Annual Review of Neuroscience*, 24(1), 167–202. <http://doi.org/10.1146/annurev.neuro.24.1.167>
- Mottaghy, F. M., Gangitano, M., Sparing, R., Krause, B. J., & Pascual-Leone, A. (2002). Segregation of areas related to visual working memory in the prefrontal cortex revealed by rTMS. *Cerebral Cortex (New York, N.Y. : 1991)*, 12(4), 369–375.
- Niendam, T. A., Laird, A. R., Ray, K. L., Dean, Y. M., Glahn, D. C., & Carter, C. S. (2012). Meta-analytic evidence for a superordinate cognitive control network subserving diverse executive functions. *Cognitive, Affective, & Behavioral Neuroscience*, 12(2), 241–268. <http://doi.org/10.3758/s13415-011-0083-5>
- Ochsner, K. N., Silvers, J. A., & Buhle, J. T. (2012). Functional imaging studies of emotion regulation: a synthetic review and evolving model of the cognitive control of emotion. *Annals of the New York Academy of Sciences*, 1251(1), E1–E24. <http://doi.org/10.1111/j.1749-6632.2012.06751.x>
- Payne, J. W., Bettman, J. R., & Johnson, E. J. (1993). The adaptive decision maker.
- Rich, E. L., & Wallis, J. D. (2016). Decoding subjective decisions from orbitofrontal cortex. *Nature Neuroscience*, 19(7), 973–980. <http://doi.org/10.1038/nn.4320>
- Robertson, E. M., Théoret, H., & Pascual-Leone, A. (2003). Studies in cognition: the problems solved and created by transcranial magnetic stimulation. *Journal of Cognitive Neuroscience*, 15(7), 948–960. <http://doi.org/10.1162/089892903770007344>
- Roesch, M. R., Singh, T., Brown, P. L., Mullins, S. E., & Schoenbaum, G. (2009). Ventral Striatal Neurons Encode the Value of the Chosen Action in Rats Deciding between Differently Delayed or Sized Rewards. *The Journal of Neuroscience*, 29(42), 13365–13376. <http://doi.org/10.1523/JNEUROSCI.2572-09.2009>
- Shen, B., Yin, Y., Wang, J., Zhou, X., McClure, S. M., & Li, J. (2016). High-definition tDCS alters impulsivity in a baseline-dependent manner. *NeuroImage*, 143, 343–352. <http://doi.org/10.1016/j.neuroimage.2016.09.006>
- Shenhav, A., Botvinick, M. M., & Cohen, J. D. (2013). The expected value of control: an integrative theory of anterior cingulate cortex function. *Neuron*, 79(2), 217–240. <http://doi.org/10.1016/j.neuron.2013.07.007>

## rTMS effects on decision framing

- Stewart, N., Chater, N., & Brown, G. D. A. (2006). Decision by sampling. *Cognitive Psychology*, 53(1), 1–26. <http://doi.org/10.1016/j.cogpsych.2005.10.003>
- Thaler, R. (1981). Some empirical evidence on dynamic inconsistency. *Economics Letters*, 8(3), 201–207. [http://doi.org/10.1016/0165-1765\(81\)90067-7](http://doi.org/10.1016/0165-1765(81)90067-7)
- Wallis, J. D. (2007). Orbitofrontal Cortex and Its Contribution to Decision-Making. *Dx.Doi.org*, 30(1), 31–56. <http://doi.org/10.1146/annurev.neuro.30.051606.094334>
- Waskom, M. L., Frank, M. C., & Wagner, A. D. (2017). Adaptive Engagement of Cognitive Control in Context-Dependent Decision Making. *Cerebral Cortex (New York, N.Y. : 1991)*, 27(2), 1270–1284. <http://doi.org/10.1093/cercor/bhv333>
- Werthenbroch, K. (1998). Consumption Self-Control by Rationing Purchase Quantities of Virtue and Vice. *Marketing Science*, 17(4), 317–337. <http://doi.org/10.1287/mksc.17.4.317>
- Yeo, B. T. T., Krienen, F. M., Eickhoff, S. B., Yaakub, S. N., Fox, P. T., Buckner, R. L., et al. (2015). Functional Specialization and Flexibility in Human Association Cortex. *Cerebral Cortex*, 25(10), 3654–3672. <http://doi.org/10.1093/cercor/bhu217>
- Yeo, B. T. T., Krienen, F. M., Sepulcre, J., Sabuncu, M. R., Lashkari, D., Hollinshead, M., et al. (2011). The organization of the human cerebral cortex estimated by intrinsic functional connectivity. *Journal of Neurophysiology*, 106(3), 1125–1165. <http://doi.org/10.1152/jn.00338.2011>
